# Supplementary material for: First-principles investigation of H2S adsorption and dissociation on titanium carbide surfaces
Source: Royal Society of Chemistry journal article supplement (doi:10.1039/c7cp05756c), 2017-01-01
Supplement: c7cp05756c1.pdf [file c7cp05756c1.pdf]

Supplementary material for  
**“First-principles investigation of H<sub>2</sub>S adsorption and dissociation on  
titanium carbide surface”**

Shiyan Wang<sup>1</sup>, Xilin Zhang<sup>1</sup>, Yanxing Zhang<sup>1</sup>, Jianjun Mao<sup>1</sup>, and Zongxian Yang<sup>1†,2,3</sup>

<sup>1</sup>*College of Physics and Materials Science, Henan Normal University, Xixiang, Henan  
453007, China*

<sup>2</sup>*National Demonstration Center for Experimental Physics Education (Henan Normal  
University), Xixiang, Henan 453007, China*

<sup>3</sup>*Collaborative Innovation Center of Nano Functional Materials and Applications, Henan  
Province, China*

---

<sup>†</sup> Corresponding author: College of Physics and Materials Science, Henan Normal University,  
Xixiang, Henan 453007, China

E-mail address: yzx@henannu.edu.cn (Z. Yang)

**Table S1.** The activation energy ( $E_{\text{act}}$  in eV) for  $\text{H}_2\text{S}$  dissociation on the surfaces of TiC, metal oxides of  $\text{CeO}_2$ , YSZ and various noble metals of Ir, Ni, Pd, Pt.

|                                                                   | $E_{\text{act}}$ (eV) |
|-------------------------------------------------------------------|-----------------------|
| TiC(001) (In this work)                                           |                       |
| $\text{H}_2\text{S} \rightarrow \text{SH} + \text{H}$             | 0.34/0.32             |
| $\text{SH} + \text{H} \rightarrow \text{S} + \text{H} + \text{H}$ | 1.32/1.48             |
| $\text{SH} \rightarrow \text{S} + \text{H}$                       | 1.16                  |
| $\text{CeO}_2(111)^1$                                             |                       |
| $\text{H}_2\text{S} \rightarrow \text{SH} + \text{H}$             | 0.19                  |
| $\text{SH} + \text{H} \rightarrow \text{S} + \text{H} + \text{H}$ | 0.69                  |
| YSZ(111) <sup>2</sup>                                             |                       |
| $\text{H}_2\text{S} \rightarrow \text{SH} + \text{H}$             | 0.17                  |
| $\text{SH} \rightarrow \text{S} + \text{H}$                       | 0.34                  |
| Ir(111) <sup>3</sup>                                              |                       |
| $\text{H}_2\text{S} \rightarrow \text{SH} + \text{H}$             | 0.16                  |
| $\text{SH} \rightarrow \text{S} + \text{H}$                       | 0.05                  |
| Ni(111) <sup>3</sup>                                              |                       |
| $\text{H}_2\text{S} \rightarrow \text{SH} + \text{H}$             | 0.21                  |
| $\text{SH} \rightarrow \text{S} + \text{H}$                       | 0.01                  |
| Pd(111) <sup>3</sup>                                              |                       |
| $\text{H}_2\text{S} \rightarrow \text{SH} + \text{H}$             | 0.22                  |
| $\text{SH} \rightarrow \text{S} + \text{H}$                       | 0.01                  |
| Pt(111) <sup>3</sup>                                              |                       |
| $\text{H}_2\text{S} \rightarrow \text{SH} + \text{H}$             | 0.07                  |
| $\text{SH} \rightarrow \text{S} + \text{H}$                       | 0.03                  |
| Pt/graphene <sup>4</sup>                                          |                       |
| $\text{H}_2\text{S} \rightarrow \text{SH} + \text{H}$             | 0.27                  |

1. D. Marrocchelli and B. Yildiz, *J. Phys. Chem. C*, 2012, **116**, 2411.
2. X. Chu, Z. Lu, Y. Zhang and Z. Yang, *Int. J. Hydrogen Energy*, 2013, **38**, 8974.
3. D. R. Alfonso, *Surf. Sci.*, 2008, **602**, 2758.
4. Y. Tang, Z. Liu, W. Chen, Z. Shen, C. Li and X. Dai, *Int. J. Hydrogen Energy*, 2015, **40**, 6942.

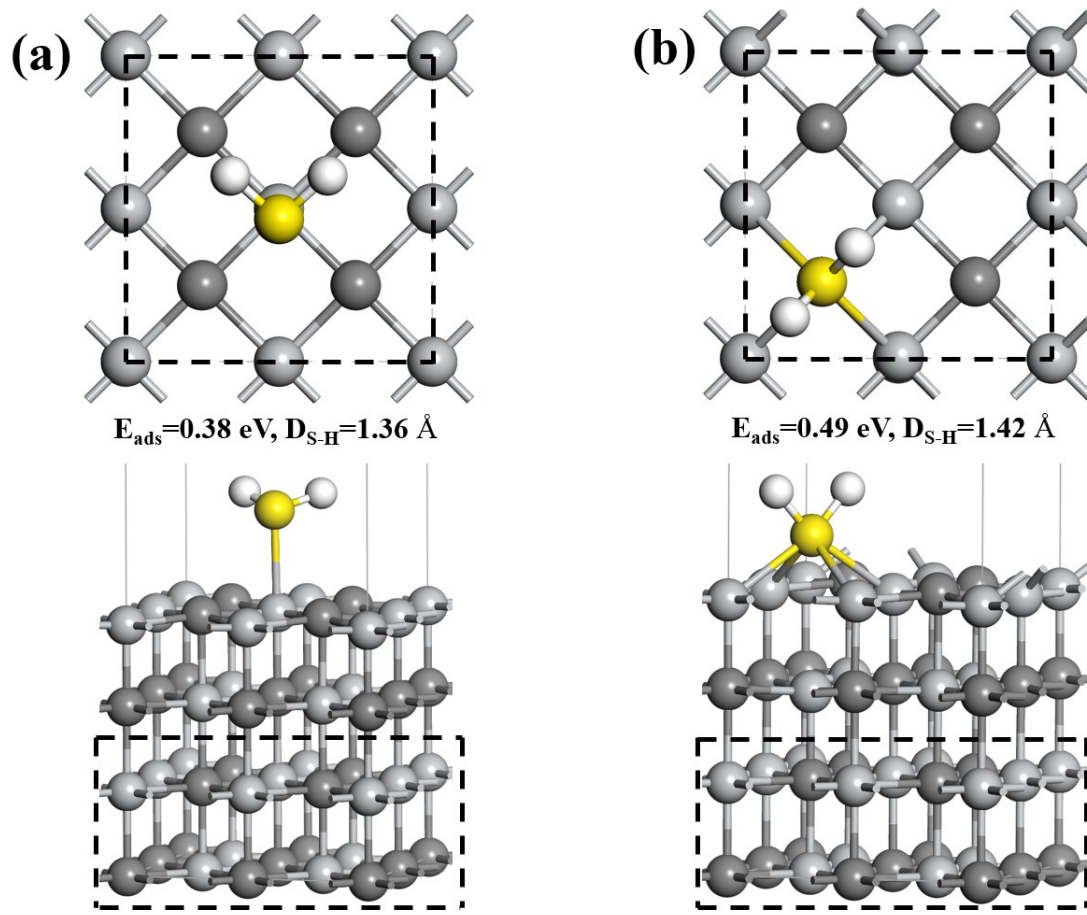

**Fig. S1.** Optimized structures for  $\text{H}_2\text{S}$  adsorbed on (a) the pure  $\text{TiC}(001)$ , (b) the defective  $\text{TiC}(001)$  surface with a carbon vacancy ( $V_{\text{C}}\text{-TiC}(001)$ ). The adsorption energies ( $E_{\text{ads}}$  in eV) and the S–H distances ( $D_{\text{S-H}}$  in  $\text{\AA}$ ) are shown in the figure. Color code: the black, light gray, yellow and white spheres denote the C, Ti, S and H, respectively.
